# Supplementary material for: Hyperthyroidism in the personalized medicine era: the rise of mathematical optimization
Source: J R Soc Interface. 2019 Jun 26;16(155):20190083. doi: 10.1098/rsif.2019.0083 (PMC6597767; doi:10.1098/rsif.2019.0083)
Supplement: objfun.m [file rsif20190083supp7.m]

function f=objfun(x) 

global B;
global NumOfvisit

m = size(B, 1);  % row number of B
sum=0;
if m <= NumOfvisit 
     for j=2:m
       S1  = x(1)*x(2)/(x(2) + B(j, 1));
       S2  = S1*exp(S1*B(j,2))/(x(3)*exp(S1*B(j,2)) -  S1*x(4));
       sum = sum +  (S2 - B(j, 3))^2;   
     end
else 

new_m = NumOfvisit;
      for j=2:new_m
         S1  = x(1)*x(2)/(x(2) + B(j, 1));
         S2  = S1*exp(S1*B(j,2))/(x(3)*exp(S1*B(j,2)) -  S1*x(4));
         sum = sum +  (S2 - B(j, 3))^2;
      end
end

f = sum;

return
